# Supplementary material for: 2-(3-Hydroxy-5-phosphonooxymethyl-2-methyl-4-pyridyl)-1,3-thiazolidine-4-carboxylic Acid, Novel Metabolite of Pyridoxal 5′-Phosphate and Cysteine Is Present in Human Plasma—Chromatographic Investigations
Source: PubMed Central journal article supplement (PMC7278924; doi:10.3390/ijms21103548), 2020-05-18

Figure S1a. <sup>1</sup>H NMR spectra of HPPTCA

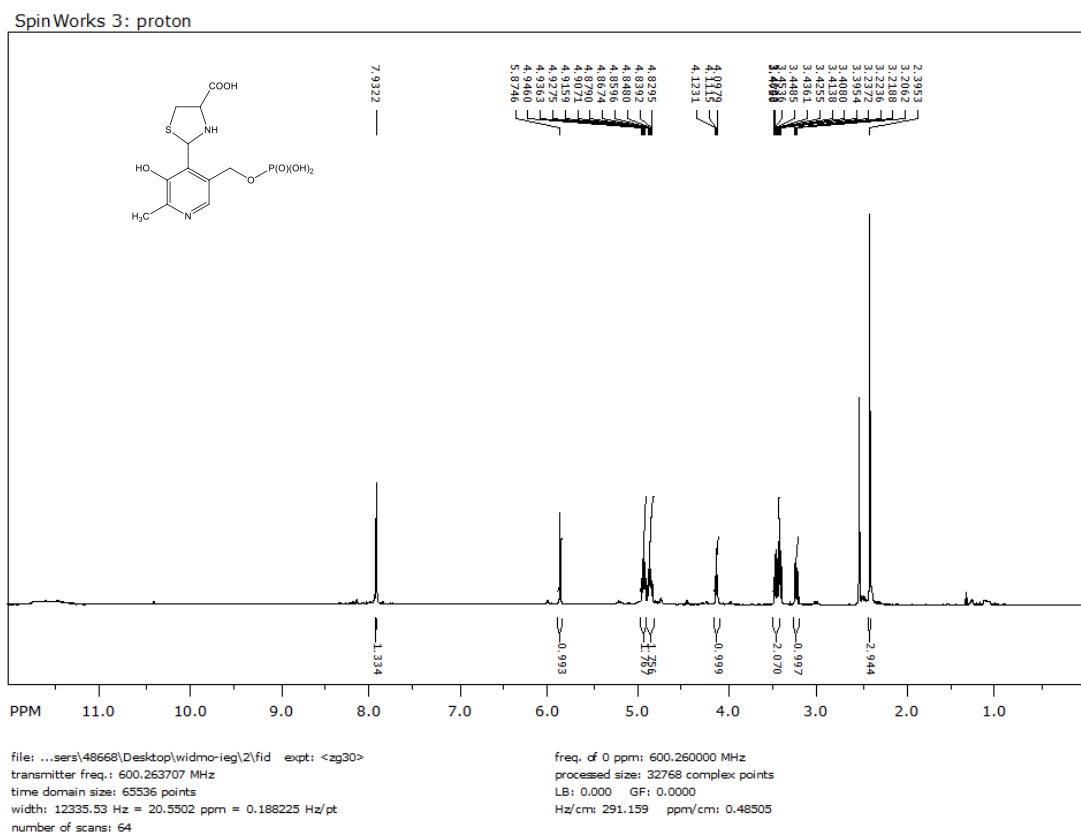

Figure S1b.  $^{13}\text{C}$  NMR spectra of HPPTCA

SpinWorks 3: 13C.stan

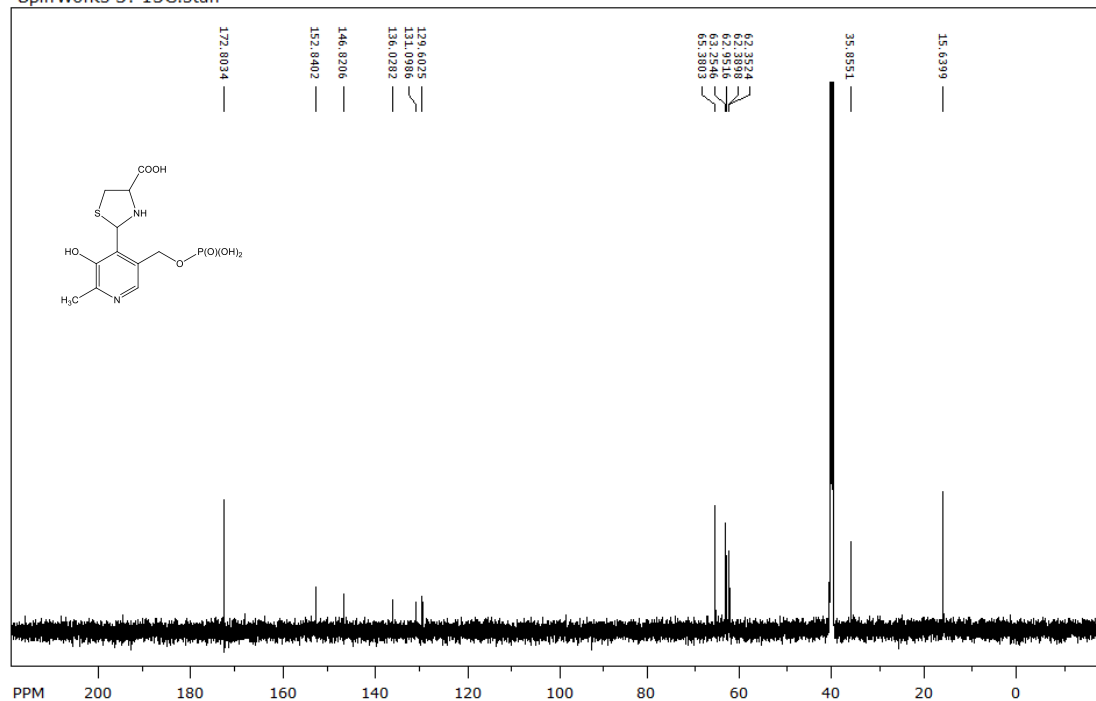

file: ...sers\48668\Desktop\widmo-ieg\6\fid expt: <zpgg30>  
transmitter freq.: 150.950591 MHz  
time domain size: 65536 points  
width: 36057.69 Hz = 238.8708 ppm = 0.550197 Hz/pt  
number of scans: 1024

freq. of 0 ppm: 150.935497 MHz  
processed size: 32768 complex points  
LB: 1.000 GF: 0.0000  
Hz/cm: 1442.308 ppm/cm: 9.55483

Figure S1c.  $^{31}\text{P}$  NMR spectra of HPPTCA

SpinWorks 3:  $^{31}\text{P}$

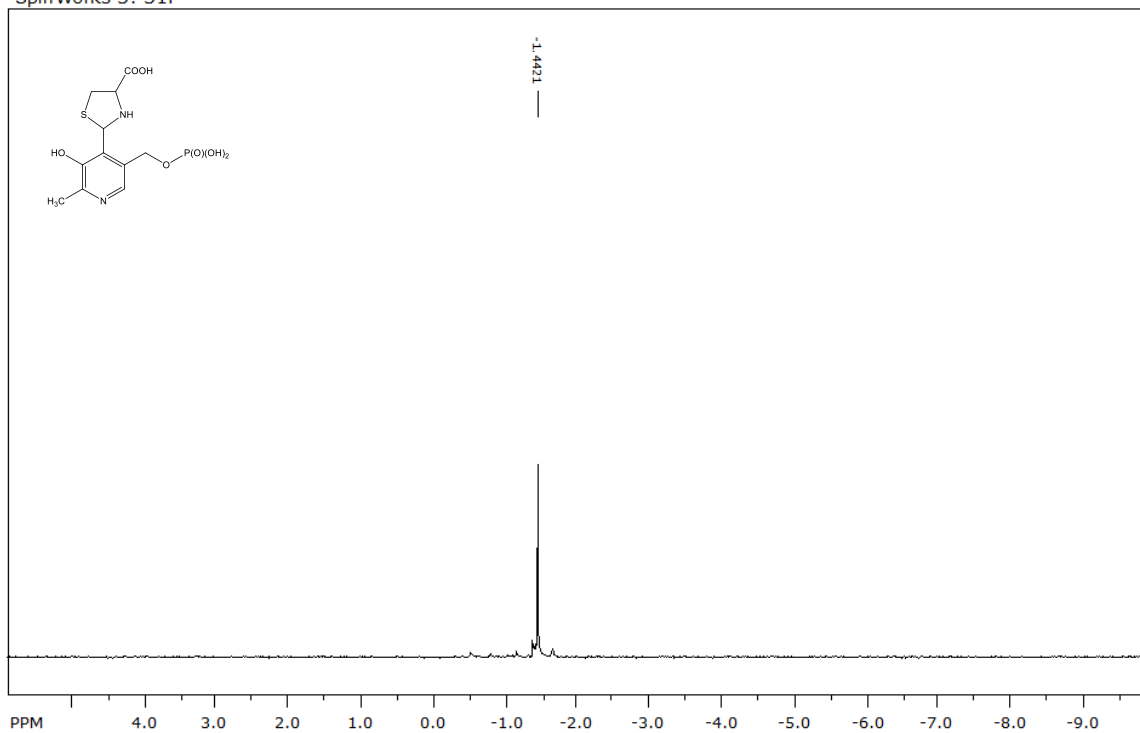

file: ...sers\48668\Desktop\widmo-ieg\4\fid exp: <zggg30>  
transmitter freq.: 242.977552 MHz  
time domain size: 65536 points  
width: 96153.85 Hz = 395.7314 ppm = 1.467191 Hz/pt  
number of scans: 16

freq. of 0 ppm: 242.989702 MHz  
processed size: 32768 complex points  
LB: 1.000 GF: 0.0000  
Hz/cm: 153.752 ppm/cm: 0.63278

**Figure S2. Protonated  $[M+H]^+$  at  $m/z$  351.00 and deprotonated  $[M-H]$  at  $m/z$  349.05 molecular ions of HPPTCA obtained in positive and negative mode, respectively.**

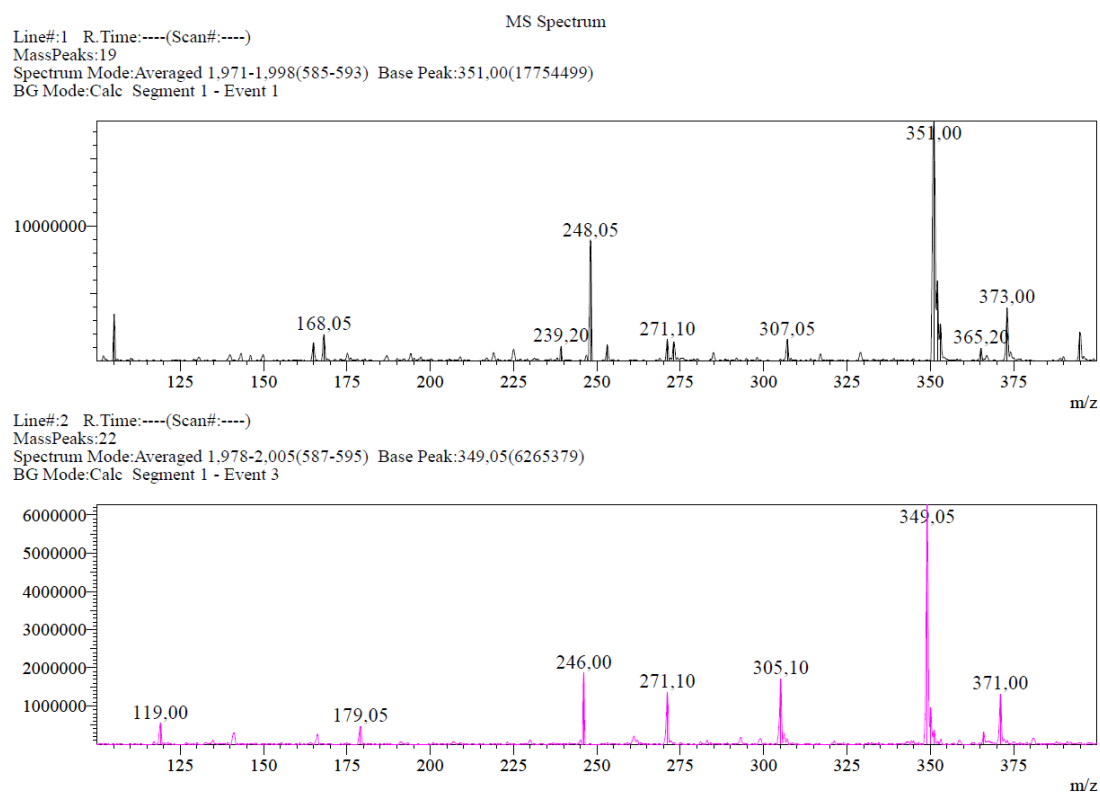

Supplement: ijms-21-03548-s001.pdf [file ijms-21-03548-s001.pdf]
